# Supplementary material for: Genome-wide discovery of circulating cell-free DNA methylation signatures for the differential diagnosis of triple-negative breast cancer
Source: PeerJ. 2025 Aug 20;13:e19888. doi: 10.7717/peerj.19888 (PMC12374692; doi:10.7717/peerj.19888)
Supplement: Supplemental Information 2 [file peerj-13-19888-s002.xlsx]

## Sheet: Sheet1
sample	stage	xray	Ultrasono__graphy	Age	height	weight	tumor_size (cm)	Lymph node status	T	N	M	ER	PR	Her-2	FISH	Molecular_subtype	ki67%	CEA（ng/ml）	CA153 (U/ml)	cg23247845 (copies/ml plasma)	cg06268921 (copies/ml plasma)
B008	non-TNBC	4a	4b	59	158	70	2	Negative	T1	N0	M0	ER (Positive)	PR (Positive)	1+	NA	Luminal	0.3	2.45	4.17	478.434	0
B009	non-TNBC	3	6	65	155	85	7	Positive	T4	N3	M1	ER (Positive)	PR (Positive)	1+	NA	Luminal	0.15	16.2	102	912.1	4.06735
B012	non-TNBC	4b	4c	50	162	69	2	Negative	T1	N0	M0	ER (Positive)	PR (Positive)	0	NA	Luminal	0.15	2.53	6.49	388.24	0
B027	non-TNBC	4c	4c	46	166	67	2	Negative	T1	N0	M0	ER (Positive)	PR (Positive)	0	NA	Luminal	0.2	0.63	8.22	488.279	0
B039	non-TNBC	NA	4b	36	155	46	1.5	Negative	T1	N0	M0	ER (Positive)	PR (Positive)	2+	negative	Luminal	0.08	0.88	5.33	313.619	0
B043	non-TNBC	4b	4b	56	160	58	1.7	Negative	T1	N0	M0	ER (Positive)	PR (Positive)	3+	NA	Luminal	0.5	1.83	21.5	283.729	0
B055	non-TNBC	NA	4c	58	167	76	1	Negative	T1	N0	M0	ER (Positive)	PR (Positive)	0	NA	Luminal	0.1	NA	NA	761.248	0
B059	non-TNBC	4c	4c	54	162	62	1.5	Negative	T1	N0	M0	ER (Positive)	PR (Positive)	1	NA	Luminal	0.06	2.2	8.33	325.399	0
B069	non-TNBC	3	4c	51	160	57	1	Negative	T1	N0	M0	ER (Positive)	PR (Positive)	1+	NA	Luminal	0.05	1.63	4.99	177.185	0
B070	non-TNBC	4b	4c	66	160	65	3	Negative	T2	N0	M0	ER (Positive)	PR (Positive)	1+	NA	Luminal	0.6	6.8	8.15	250.569	0
B075	non-TNBC	4b	4c	74	NA	162	4	Negative	T2	N0	M0	ER (Positive)	PR (Positive)	1+	NA	Luminal	0.7	2.1	6.3	615.742	0
B077	non-TNBC	NA	4c	61	158	65	3	Positive	T2	N1	M0	ER (Positive)	PR (Positive)	2+	negative	Luminal	0.2	2.47	10.9	281.991	0
B085	non-TNBC	4c	4b	58	155	70	2	Positive	T1	N1	M0	ER (Positive)	PR (Positive)	2+	NA	Luminal	0.4	7.31	36	277.051	0
B086	non-TNBC	4b	4c	54	158	80	4	Negative	T2	N0	M0	ER (Positive)	PR (Positive)	3+	NA	Luminal	0.08	1.69	9.41	863.679	0
B089	non-TNBC	4a	NA	66	160	64	3	Negative	T2	N0	M0	ER (Positive)	PR (Negative)	0	NA	Luminal	0.15	1.96	15.4	308.918	0
B090	non-TNBC	4c	4c	63	156	71	5	Negative	T2	N0	M0	ER (Positive)	PR (Positive)	1+	NA	Luminal	0.2	NA	NA	223.957	1.59008
B107	non-TNBC	4b	4c	56	163	65	2.5	Negative	T2	N0	M0	ER (Positive)	PR (Positive)	1+	NA	Luminal	0.2	0.43	10.9	116.919	0
B108	non-TNBC	4b	4a	45	162	70	1.5	Negative	T1	N0	M0	ER (Positive)	PR (Positive)	0	NA	Luminal	0.1	1.03	10.3	150.586	0
B128	non-TNBC	4b	4c	49	160	65	3	Negative	T2	N0	M0	ER (Positive)	PR (Positive)	3+	NA	Luminal	0.2	2.9	34.3	465.533	0
B129	non-TNBC	4a	4c	51	160	62.5	5	Negative	T2	N0	M0	ER (Positive)	PR (Positive)	2+	NA	Luminal	0.15	2.97	17.8	223.328	0
B134	non-TNBC	6	6	56	160	65	7	Positive	T3	N1	M0	ER (Positive)	PR (Negative)	3+	NA	Luminal	0.2	1.83	14.6	269.504	0
B136	non-TNBC	5	4c	67	160	60	3.5	Negative	T2	N0	M0	ER (Positive)	PR (Positive)	1+	NA	Luminal	0.2	2.15	9.36	226.739	0
B137	non-TNBC	4b	4b	53	163	70	1	Negative	T1	N0	M0	ER (Positive)	PR (Positive)	1+	NA	Luminal	0.1	1.49	18.8	159.205	2.15558
B142	non-TNBC	4b	4b	64	167	90	5	Positive	T2	N2	M0	ER (Positive)	PR (Positive)	1+	NA	Luminal	0.25	3.51	10.8	327.554	0
B144	non-TNBC	4a	4b	77	155	52	3.5	Negative	T2	N0	M0	ER (Positive)	PR (Positive)	1+	NA	Luminal	0.2	2.4	10.7	433.871	1.41583
B146	non-TNBC	NA	4c	73	157	54	3.2	Positive	T2	N3	M0	ER (Positive)	PR (Positive)	1+	NA	Luminal	0.15	45.7	72.9	459.584	2.0384
B147	non-TNBC	4c	4b	52	163	62.5	4	Negative	T2	N0	M0	ER (Negative)	PR (Negative)	3+	NA	HER2+	0.15	7.97	9.93	361.057	0
B161	non-TNBC	4c	4c	67	165	60	2.5	Negative	T2	N0	M0	ER (Positive)	PR (Positive)	3+	NA	Luminal	0.2	1.94	7.39	501.801	2.01544
B169	non-TNBC	NA	4c	56	162	65	3	Negative	T2	N0	M0	ER (Negative)	PR (Negative)	3+	NA	HER2+	0.3	1.37	6.49	419.176	0
B170	non-TNBC	4a	4b	66	170	80	1	Negative	T1	N0	M0	ER (Positive)	PR (Positive)	1+	NA	Luminal	0.1	2.09	10.48	405.467	0
B194	non-TNBC	4b	4c	53	164	86	3	Positive	T2	N2	M0	ER (Positive)	PR (Positive)	0	NA	Luminal	0.5	0.66	7.26	245.91	2.00401
B195	non-TNBC	4b	4a	72	156	46	1	Negative	T1	N0	M0	ER (Positive)	PR (Positive)	1+	NA	Luminal	0.05	2.2	8.88	177.222	0.978293
B196	non-TNBC	4a	4c	46	166	60	2	Positive	T1	N1	M0	ER (Positive)	PR (Positive)	1+	NA	Luminal	0.15	1.75	7.42	111.774	0
B202	non-TNBC	4b	4c	81	160	55	2	Positive	T1	N2	M0	ER (Positive)	PR (Positive)	1+	NA	Luminal	0.08	1.48	36.1	282.036	1.39071
B210	non-TNBC	2	4a	54	162	68.8	3	Positive	T2	N3	M0	ER (Positive)	PR (Positive)	3+	NA	Luminal	0.2	0.58	13.32	317.68	1.26918
B221	non-TNBC	5	4c	70	149	68	1.5	Negative	T1	N0	M0	ER (Negative)	PR (Positive)	0	NA	Luminal	0.6	1.83	7.25	89.1792	2.96542
B222	non-TNBC	4a	4c	48	154	49	3	Negative	T2	N0	M0	ER (Positive)	PR (Positive)	0	NA	Luminal	0.2	1.29	13.36	1653.01	0
B240	non-TNBC	4c	5	60	158	76	4	Positive	T2	N2	M0	ER (Positive)	PR (Positive)	2+	NA	Luminal	0.08	NA	NA	369.913	3.98182
B245	non-TNBC	4a	4c	60	160	64	2	Positive	T1	N1	M0	ER (Positive)	PR (Positive)	0	NA	Luminal	0.2	3.66	8.36	276.27	0
B254	non-TNBC	4a	4c	48	160	70	4	Positive	T2	N2	M0	ER (Positive)	PR (Positive)	1+	NA	Luminal	0.6	1.44	5.35	1581.22	0
B255	non-TNBC	NA	5	42	158	60	1.5	Positive	T1	N1	M0	ER (Positive)	PR (Positive)	2+	NA	Luminal	0.45	NA	NA	71.2018	0
B284	non-TNBC	5	NA	63	146	55	3	Negative	T2	N0	M0	ER (Positive)	PR (Positive)	2+	NA	Luminal	0.3	<0.3	8.69	447.234	3.05528
B286	non-TNBC	NA	NA	72	158	66	4	Positive	T2	N3	M0	ER (Positive)	PR (Positive)	3+	NA	Luminal	0.3	NA	NA	867.82	0
B288	non-TNBC	3	NA	68	165	70	2	Negative	T1	N0	M0	ER (Positive)	PR (Positive)	2+	NA	Luminal	0.3	0.88	7.28	977.761	0
B290	non-TNBC	4a	NA	50	160	59	2.5	Positive	T2	N1	M0	ER (Positive)	PR (Positive)	1+	NA	Luminal	0.25	2.35	18.32	5165.47	0
B296	non-TNBC	NA	NA	71	160	70	2	Positive	T1	N3	M0	ER (Positive)	PR (Positive)	0	NA	Luminal	0.15	1.13	6.94	88.7366	0
B306	non-TNBC	4a	4a	71	158	60	0.9	Negative	T1	N0	M0	ER (Positive)	PR (Positive)	1+	NA	Luminal	0.05	2.2	17.9	172.65	0
B313	non-TNBC	5	4c	59	165	72.5	1.5	Negative	T1	N0	M0	ER (Positive)	PR (Positive)	0	NA	Luminal	0.3	1.05	4.41	350.093	0
B325	non-TNBC	NA	NA	61	158	68	3	Positive	T2	N1	M0	ER (Positive)	PR (Positive)	2+	NA	Luminal	0.25	NA	NA	155.039	0
B331	non-TNBC	4b	NA	66	158	55	3	Negative	T2	N0	M0	ER (Positive)	PR (Positive)	3+	NA	Luminal	60	1.21	13.6	426.068	0
B345	non-TNBC	4b	4c	69	163	61	5	Positive	T2	N2	M0	ER (Positive)	PR (Positive)	0	NA	Luminal	0.4	0.89	8.33	92.2695	0
B362	non-TNBC	4b	NA	68	156	61	2	Positive	T1	N2	M0	ER (Positive)	PR (Positive)	2+	NA	Luminal	0.3	1.4	16.8	933.743	0
B367	non-TNBC	NA	5	43	155	60	3	Positive	T2	N1	M0	ER (Positive)	PR (Positive)	2+	NA	Luminal	0.4	NA	NA	242.82	0
B369	non-TNBC	4c	4c	46	162	75	2	Negative	T1	N0	M0	ER (Positive)	PR (Positive)	2+	NA	Luminal	0.2	3.76	9.95	171.845	0
B380	non-TNBC	6	4c	66	155	55	3	Negative	T2	N0	M0	ER (Negative)	PR (Negative)	3+	NA	HER2+	0.6	1.76	16.2	407.686	3.62482
B381	non-TNBC	4b	NA	43	160	70	3.5	Positive	T2	N1	M0	ER (Positive)	PR (Positive)	2+	NA	Luminal	0.3	0.77	7.23	336.574	0
B393	non-TNBC	4b	4c	74	165	74.4	2.5	Negative	T2	N0	M0	ER (Positive)	PR (Positive)	1+	NA	Luminal	0.1	0.88	8.67	166.465	0
B406	non-TNBC	4a	4b	58	165	66	3.5	Negative	T2	N0	M0	ER (Positive)	PR (Positive)	0	NA	Luminal	0.05	0.72	7.46	334.76	2.13125
B422	non-TNBC	4a	NA	39	160	75	2	Negative	T1	N0	M0	ER (Positive)	PR (Positive)	1+	NA	Luminal	0.15	NA	NA	301.898	0
B429	non-TNBC	6	4b	49	167	80	2	Positive	T1	N3	M0	ER (Positive)	PR (Positive)	0	NA	Luminal	0.4	1.24	9.56	164.086	3.80409
B431	non-TNBC	4b	5	54	155	95	2	Negative	T1	N0	M0	ER (Positive)	PR (Positive)	1+	NA	Luminal	0.2	1.58	6.39	720.35	0
B432	non-TNBC	4a	4b	72	162	65	2	Negative	T1	N0	M0	ER (Positive)	PR (Positive)	1	NA	Luminal	0.1	1.97	9.65	464.349	4.03387
B433	non-TNBC	4c	4c	57	155	62.5	3.5	Negative	T2	N0	M0	ER (Positive)	PR (Positive)	0	NA	Luminal	0.05	6.18	6.81	145.649	0
B448	non-TNBC	4c	4c	75	165	66.5	5.5	Negative	T3	N0	M0	ER (Positive)	PR (Positive)	0	NA	Luminal	0.15	2.79	16.8	175.609	1.73131
B451	non-TNBC	4c	NA	60	163	65	0.8	Positive	T1	N3	M0	ER (Positive)	PR (Positive)	2+	NA	Luminal	0.15	4.45	9.61	389.955	2.85919
B461	non-TNBC	4c	4c	69	165	67	1.5	Negative	T1	N0	M0	ER (Positive)	PR (Positive)	0	NA	Luminal	0.08	0.61	2.1	193.621	0
B463	non-TNBC	4a	NA	47	162	80	1.5	Negative	T1	N0	M0	ER (Positive)	PR (Positive)	0	NA	Luminal	0.05	2.45	14.04	175.346	1.35306
B466	non-TNBC	4b	5	62	166	70	2.5	Positive	T2	N2	M0	ER (Positive)	PR (Positive)	1+	NA	Luminal	0.25	1.12	5.23	550.025	3.58489
B467	non-TNBC	4a	NA	47	158	80	1.5	Negative	T1	N0	M0	ER (Positive)	PR (Positive)	0	NA	Luminal	0.05	2.45	14.04	192.407	0
B470	non-TNBC	4c	4c	63	160	70	3	Negative	T2	N0	M0	ER (Positive)	PR (Positive)	0	NA	Luminal	0.05	3.87	18.6	360.316	0
B478	non-TNBC	4a	4b	43	160	50	2	Negative	T1	N0	M0	ER (Positive)	PR (Positive)	0	NA	Luminal	0.05	1.25	7.47	232.366	0
B481	non-TNBC	4b	4c	77	160	66	2	Negative	T1	N0	M0	ER (Positive)	PR (Positive)	1+	NA	Luminal	0.15	4.12	7.23	290.945	1.30125
B487	non-TNBC	5	5	59	149	54	8	Negative	T3	N0	M0	ER (Positive)	PR (Positive)	2+	NA	Luminal	0.15	1.53	13.2	305.054	0
B489	non-TNBC	4c	4c	58	150	55	3	Positive	T2	N3	M0	ER (Positive)	PR (Positive)	2+	NA	Luminal	0.2	1.07	6.11	501.365	4.0896
B491	non-TNBC	4c	4c	82	160	55	1.5	Negative	T1	N0	M0	ER (Positive)	PR (Positive)	0	NA	Luminal	0.15	NA	NA	196.54	1.14929
B495	non-TNBC	4b	4c	68	166	75	2	Negative	T1	N0	M0	ER (Positive)	PR (Negative)	0	NA	Luminal	0.2	NA	NA	618.809	0
B502	non-TNBC	4a	4a	54	160	63	1.5	Negative	T1	N0	M0	ER (Positive)	PR (Positive)	1+	NA	Luminal	0.1	0.97	9.85	159.968	0
B506	non-TNBC	4b	4c	60	170	67	2.5	Negative	T2	N0	M0	ER (Positive)	PR (Positive)	2+	NA	Luminal	0.3	1.89	9.03	293.103	0
B519	non-TNBC	4b	4b	60	155	60	8	Negative	T3	N0	M0	ER (Positive)	PR (Positive)	1+	NA	Luminal	0.15	1.79	9.71	234.651	1.23284
B525	non-TNBC	4c	4c	75	163	73	2	Negative	T1	N0	M0	ER (Positive)	PR (Positive)	1+	NA	Luminal	0.3	1.21	17.3	341.954	0
B026	Stage I	4a	4c	63	155	55	2	Negative	T1	N0	M0	ER (Negative)	PR (Negative)	1+	NA	TNBC	0.25	2.07	7.56	495.037	0
B034	Stage I	4b	4b	62	160	65	2	Negative	T1	N0	M0	ER (Negative)	PR (Negative)	0	NA	TNBC	0.8	NA	NA	264.319	2.89933
B041	Stage I	3	4a	68	167	77.5	1.5	Negative	T1	N0	M0	ER (Negative)	PR (Negative)	2+	negative	TNBC	0.05	1.64	6.89	213.021	1.68122
B121	Stage I	6	4c	62	155	57	1	Negative	T1	N0	M0	ER (Negative)	PR (Negative)	0	NA	TNBC	0.5	4.94	10.5	158.742	2.87175
B148	Stage I	4b	4c	64	158	53	1.5	Negative	T1	N0	M0	ER (Negative)	PR (Negative)	0	NA	TNBC	0.6	4.39	5.1	188.65	1.64703
B156	Stage I	4a	4a	54	163	77	2	Negative	T1	N0	M0	ER (Negative)	PR (Negative)	0	NA	TNBC	0.5	0.6	4.3	1680.01	13.1511
B181	Stage I	3	4b	65	164	56.5	2	Negative	T1	N0	M0	ER (Negative)	PR (Negative)	2+	negative	TNBC	0.15	NA	NA	201.528	0
B193	Stage I	4a	NA	54	155	50	2	Negative	T1	N0	M0	ER (Negative)	PR (Negative)	0	NA	TNBC	0.4	1.72	4.29	935.525	0
B209	Stage I	4a	4b	45	165	70	1.5	Negative	T1	N0	M0	ER (Negative)	PR (Negative)	2+	negative	TNBC	0.8	0.93	12.8	585.888	0
B220	Stage I	4a	4b	47	165	71	2	Negative	T1	N0	M0	ER (Negative)	PR (Negative)	1+	NA	TNBC	0.8	3.28	13.6	191.354	4.39681
B251	Stage I	4b	4c	52	158	52	1.5	Negative	T1	N0	M0	ER (Negative)	PR (Negative)	0	NA	TNBC	0.3	1.37	12.56	114.022	0
B312	Stage I	4b	4a	54	160	60	2	Negative	T1	N0	M0	ER (Negative)	PR (Negative)	1+	NA	TNBC	0.6	1.45	12.94	369.456	4.09434
B361	Stage I	NA	NA	67	NA	NA	1.5	Negative	T1	N0	M0	ER (Negative)	PR (Negative)	0	NA	TNBC	0.1	NA	NA	354.607	1.40145
B395	Stage I	NA	NA	46	NA	NA	1.5	Negative	T1	N0	M0	ER (Negative)	PR (Negative)	0	NA	TNBC	0.3	NA	NA	232.82	0
B402	Stage I	NA	NA	59	NA	NA	1.5	Negative	T1	N0	M0	ER (Negative)	PR (Negative)	1+	NA	TNBC	0.3	NA	NA	413.348	5.02438
B408	Stage II	4b	4c	63	167	59	3	Positive	T2	N1	M0	ER (Negative)	PR (Negative)	0	NA	TNBC	0.4	2.13	11.7	192.707	0
B415	Stage II	4a	NA	37	158	68	4	Negative	T2	N0	M0	ER (Negative)	PR (Negative)	2+	negative	TNBC	0.1	1.1	10.7	472.496	1.67265
B435	Stage II	4a	4b	51	无	无	3	Negative	T2	N0	M0	ER (Negative)	PR (Negative)	0	NA	TNBC	0.4	1.4	8.2	294.001	0
B447	Stage II	NA	5	61	168	60	1.5	Positive	T1	N1	M0	ER (Negative)	PR (Negative)	1+	NA	TNBC	0.25	1.23	7.71	890.348	10.7439
B476	Stage II	6	4b	46	155	53	3	Negative	T2	N0	M0	ER (Negative)	PR (Negative)	0	NA	TNBC	0.3	2.11	7.02	85.5958	1.89879
B508	Stage II	4a	4b	67	158	55	2	Positive	T1	N1	M0	ER (Negative)	PR (Negative)	2+	negative	TNBC	0.5	1	21	304.163	36.8872
B518	Stage II	NA	NA	51	166	63	4	Positive	T2	N1	M0	ER (Negative)	PR (Negative)	2+	negative	TNBC	0.3	3.14	14.2	135.99	0
LB2	Stage II	NA	NA	53	145	58	2	Positive	T1	N1	M0	ER (Negative)	PR (Negative)	1+	NA	TNBC	0.2	0.5	2.36	233.363	0
LB3	Stage II	3	4b	45	170	60	3	Positive	T2	N1	M0	ER (Negative)	PR (Negative)	0	NA	TNBC	0.8	0.49	11.5	91.3082	1.38016
LB33	Stage II	4b	4a	66	155	70	4	Negative	T2	N0	M0	ER (Negative)	PR (Negative)	1+	NA	TNBC	0.2	2.32	10	241.705	1.20039
LB8	Stage II	NA	NA	63	NA	NA	1.5	Positive	T1	N1	M1	ER (Negative)	PR (Negative)	0	NA	TNBC	0.4	NA	NA	291.235	6.38294
B003	Stage III	NA	4c	69	156	60	6	Positive	T3	N2	M0	ER (Negative)	PR (Negative)	0	NA	TNBC	0.4	1.21	13.24	822.208	7.16479
B013	Stage III	5	5	70	168	75	3	Positive	T2	N3	M0	ER (Negative)	PR (Positive)	0	NA	TNBC	0.1	1.65	9.13	498.9	1.4841
B036	Stage III	4c	4c	71	158	58	3	Positive	T2	N3	M0	ER (Negative)	PR (Negative)	0	NA	TNBC	0.2	1.12	7.79	520.608	3.55459
B135	Stage III	NA	NA	60	165	65	7	Positive	T3	N2	M0	ER (Negative)	PR (Negative)	0	NA	TNBC	0.8	NA	NA	484.594	13.8916
B145	Stage III	NA	NA	70	NA	NA	3	Positive	T2	N2	M0	ER (Negative)	PR (Negative)	2+	negative	TNBC	0.6	NA	NA	119.797	78.4722
B385	Stage IV	5	5	58	160	53	4	Positive	T2	N2	M1	ER (Negative)	PR (Negative)	0	NA	TNBC	0.6	1.94	8.22	707.995	9.63136
LB4	Stage IV	4c	5	73	153	55	4	Positive	T2	N1	M1	ER (Negative)	PR (Negative)	0	NA	TNBC	0.6	0.95	10.4	421.221	0

## Sheet: Sheet2
Date	Sample	Target	Accepted Droplets	Positives	Conc(copies/µL)	Copies/20µLWell
2023.11.14	M	cg06268921	14527	85	6.90395	138.079
2023.11.14	M	cg23247845	14527	147	11.9655	239.309
2023.11.14	M	ACTB	14527	271	22.1543	443.085
2023.11.14	U	cg06268921	14455	0	0	0
2023.11.14	U	cg23247845	14455	0	0	0
2023.11.14	U	ACTB	14455	405	33.4329	668.658
2023.11.14	H2O	cg06268921	11726	0	0	0
2023.11.14	H2O	cg23247845	11726	0	0	0
2023.11.14	H2O	ACTB	11726	0	0	0
2023.11.14	NTC	cg06268921	11726	0	0	0
2023.11.14	NTC	cg23247845	11726	0	0	0
2023.11.14	NTC	ACTB	11726	0	0	0
2023.11.14	B284	cg06268921	11219	2	0.209747	4.19494
2023.11.14	B284	cg23247845	11219	289	30.7029	614.058
2023.11.14	B284	ACTB	11219	598	64.4419	1288.84
2023.11.14	B107	cg06268921	13011	0	0	0
2023.11.14	B107	cg23247845	13011	94	8.53045	170.609
2023.11.14	B107	ACTB	13011	106	9.62391	192.478
2023.11.14	B286	cg06268921	9867	0	0	0
2023.11.14	B286	cg23247845	9867	453	55.2917	1105.83
2023.11.14	B286	ACTB	9867	798	99.2163	1984.33
2023.11.14	B288	cg06268921	9409	0	0	0
2023.11.14	B288	cg23247845	9409	480	61.6027	1232.05
2023.11.14	B288	ACTB	9409	935	123.134	2462.68
Date	Sample	Target	Accepted Droplets	Positives	Conc(copies/µL)	Copies/20µLWell
2023.11.20	M	cg23247845	14883	169	13.4355	268.711
2023.11.20	M	cg06268921	14883	102	8.09065	161.813
2023.11.20	M	ACTB	14883	247	19.6887	393.774
2023.11.20	U	cg23247845	14672	0	0	0
2023.11.20	U	cg06268921	14672	0	0	0
2023.11.20	U	ACTB	14672	427	34.747	694.94
2023.11.20	H2O	cg23247845	16721	0	0	0
2023.11.20	H2O	cg06268921	16721	0	0	0
2023.11.20	H2O	ACTB	16721	0	0	0
2023.11.20	NTC	cg23247845	15598	1	0	0
2023.11.20	NTC	cg06268921	15598	0	0	0
2023.11.20	NTC	ACTB	15598	1	0	0
2023.11.20	B003	cg23247845	13485	505	44.9038	898.076
2023.11.20	B003	cg06268921	13485	7	0.610859	12.2172
2023.11.20	B003	ACTB	13485	1075	97.7357	1954.71
2023.11.20	B012	cg23247845	12853	253	23.3887	467.775
2023.11.20	B012	cg06268921	12853	1	0	0
2023.11.20	B012	ACTB	12853	536	50.1139	1002.28
Date	Sample	Target	Accepted Droplets	Positives	Conc(copies/µL)	Copies/20µLWell
2023.11.24	M	cg23247845	14712	173	13.9162	278.325
2023.11.24	M	cg06268921	14712	114	9.15171	183.034
2023.11.24	M	ACTB	14712	285	23.0142	460.283
2023.11.24	U	cg23247845	12968	0	0	0
2023.11.24	U	cg06268921	12968	0	0	0
2023.11.24	U	ACTB	12968	466	43.0543	861.086
2023.11.24	H2O	cg23247845	13177	0	0	0
2023.11.24	H2O	cg06268921	13177	0	0	0
2023.11.24	H2O	ACTB	13177	1	0	0
2023.11.24	NTC	cg23247845	13830	0	0	0
2023.11.24	NTC	cg06268921	13830	0	0	0
2023.11.24	NTC	ACTB	13830	1	0	0
2023.11.24	B008	cg23247845	11336	265	27.8287	556.575
2023.11.24	B008	cg06268921	11336	0	0	0
2023.11.24	B008	ACTB	11336	561	59.7116	1194.23
2023.11.24	B009	cg23247845	12471	655	63.4722	1269.44
2023.11.24	B009	cg06268921	12471	3	0.283044	5.66087
2023.11.24	B009	ACTB	12471	1408	140.941	2818.82
2023.11.24	B013	cg23247845	9230	261	33.7469	674.938
2023.11.24	B013	cg06268921	9230	6	0.765018	15.3004
2023.11.24	B013	ACTB	9230	554	72.8217	1456.43
Date	Sample	Target	Accepted Droplets	Positives	Conc(copies/µL)	Copies/20µLWell
2023.11.29	M	cg23247845	13403	161	14.2176	284.352
2023.11.29	M	cg06268921	13403	82	7.21979	144.396
2023.11.29	M	ACTB	13403	228	20.1853	403.705
2023.11.29	U	cg23247845	10883	0	0	0
2023.11.29	U	cg06268921	10883	0	0	0
2023.11.29	U	ACTB	10883	377	41.477	829.539
2023.11.29	H2O	cg23247845	11591	0	0	0
2023.11.29	H2O	cg06268921	11591	0	0	0
2023.11.29	H2O	ACTB	11591	0	0	0
2023.11.29	NTC	cg23247845	15083	0	0	0
2023.11.29	NTC	cg06268921	15083	0	0	0
2023.11.29	NTC	ACTB	15083	0	0	0
2023.11.29	B027	cg23247845	10349	303	34.9592	699.185
2023.11.29	B027	cg06268921	10349	1	0	0
2023.11.29	B027	ACTB	10349	579	67.7334	1354.67
2023.11.29	B026	cg23247845	9968	214	25.5324	510.647
2023.11.29	B026	cg06268921	9968	0	0	0
2023.11.29	B026	ACTB	9968	457	55.2129	1104.26
2023.11.29	B039	cg23247845	9054	117	15.302	306.04
2023.11.29	B039	cg06268921	9054	0	0	0
2023.11.29	B039	ACTB	9054	204	26.8108	536.216
2023.11.29	B055	cg23247845	9418	378	48.1924	963.849
2023.11.29	B055	cg06268921	9418	1	0	0
2023.11.29	B055	ACTB	9418	666	86.2829	1725.66
Date	Sample	Target	Accepted Droplets	Positives	Conc(copies/µL)	Copies/20µLWell
2023.12.11	M	cg06268921	14588	120	9.7176	194.352
2023.12.11	M	cg23247845	14588	181	14.6883	293.766
2023.12.11	M	ACTB	14588	333	27.1665	543.331
2023.12.11	U	cg06268921	15968	0	0	0
2023.12.11	U	cg23247845	15968	0	0	0
2023.12.11	U	ACTB	15968	634	47.6637	953.274
2023.12.11	H2O	cg06268921	17458	0	0	0
2023.12.11	H2O	cg23247845	17458	0	0	0
2023.12.11	H2O	ACTB	17458	0	0	0
2023.12.11	NTC	cg06268921	15446	0	0	0
2023.12.11	NTC	cg23247845	15446	0	0	0
2023.12.11	NTC	ACTB	15446	0	0	0
2023.12.11	B043	cg06268921	10824	0	0	0
2023.12.11	B043	cg23247845	10824	171	18.7345	374.691
2023.12.11	B043	ACTB	10824	399	44.1872	883.744
2023.12.11	B034	cg06268921	12288	2	0.191498	3.82997
2023.12.11	B034	cg23247845	12288	181	17.4581	349.162
2023.12.11	B034	ACTB	12288	450	43.8923	877.847
2023.12.11	B036	cg06268921	12576	5	0.467837	9.35675
2023.12.11	B036	cg23247845	12576	561	53.6875	1073.75
2023.12.11	B036	ACTB	12576	1331	131.608	2632.16
2023.12.11	B059	cg06268921	12324	0	0	0
2023.12.11	B059	cg23247845	12324	210	20.2197	404.395
2023.12.11	B059	ACTB	12324	498	48.5272	970.543
Date	Sample	Target	Accepted Droplets	Positives	Conc(copies/µL)	Copies/20µLWell
2023.12.13	M	cg06268921	12736	119	11.0441	220.883
2023.12.13	M	cg23247845	12736	183	17.027	340.54
2023.12.13	M	ACTB	12736	278	25.9643	519.286
2023.12.13	U	cg06268921	14086	0	0	0
2023.12.13	U	cg23247845	14086	0	0	0
2023.12.13	U	ACTB	14086	436	36.9904	739.809
2023.12.13	H2O	cg06268921	14734	0	0	0
2023.12.13	H2O	cg23247845	14734	0	0	0
2023.12.13	H2O	ACTB	14734	0	0	0
2023.12.13	NTC	cg06268921	12420	0	0	0
2023.12.13	NTC	cg23247845	12420	0	0	0
2023.12.13	NTC	ACTB	12420	0	0	0
2023.12.13	B070	cg06268921	12904	0	0	0
2023.12.13	B070	cg23247845	12904	152	13.9403	278.805
2023.12.13	B070	ACTB	12904	332	30.665	613.299
2023.12.13	B041	cg06268921	11366	0	0	0
2023.12.13	B041	cg23247845	11366	120	12.487	249.74
2023.12.13	B041	ACTB	11366	270	28.2844	565.688
2023.12.13	B075	cg06268921	10975	0	0	0
2023.12.13	B075	cg23247845	10975	319	34.7022	694.043
2023.12.13	B075	ACTB	10975	592	65.2354	1304.71
2023.12.13	B077	cg06268921	9375	0	0	0
2023.12.13	B077	cg23247845	9375	138	17.4464	348.927
2023.12.13	B077	ACTB	9375	344	43.9805	879.611
Date	Sample	Target	Accepted Droplets	Positives	Conc(copies/µL)	Copies/20µLWell
2023.12.16	M	cg06268921	8078	85	14.2138	284.276
2023.12.16	M	cg23247845	8078	95	15.8974	317.947
2023.12.16	M	ACTB	8078	210	35.4335	708.669
2023.12.16	U	cg06268921	10127	0	0	0
2023.12.16	U	cg23247845	10127	0	0	0
2023.12.16	U	ACTB	10127	229	26.9087	538.174
2023.12.16	H2O	cg06268921	11440	0	0	0
2023.12.16	H2O	cg23247845	11440	0	0	0
2023.12.16	H2O	ACTB	11440	0	0	0
2023.12.16	NTC	cg06268921	10950	0	0	0
2023.12.16	NTC	cg23247845	10950	0	0	0
2023.12.16	NTC	ACTB	10950	0	0	0
2023.12.16	B085	cg06268921	8181	0	0	0
2023.12.16	B085	cg23247845	8181	118	17.0926	341.852
2023.12.16	B085	ACTB	8181	387	57.012	1140.24
2023.12.16	B069	cg06268921	8285	0	0	0
2023.12.16	B069	cg23247845	8285	76	10.8418	216.836
2023.12.16	B069	ACTB	8285	191	27.4395	548.791
Date	Sample	Target	Accepted Droplets	Positives	Conc(copies/µL)	Copies/20µLWell
2024.1.5	M	cg06268921	14602	158	12.7993	255.986
2024.1.5	M	cg23247845	14602	289	23.518	470.36
2024.1.5	M	ACTB	14602	487	39.9064	798.128
2024.1.5	U	cg06268921	13030	0	0	0
2024.1.5	U	cg23247845	13030	0	0	0
2024.1.5	U	ACTB	13030	241	21.9635	439.27
2024.1.5	H2O	cg06268921	14490	0	0	0
2024.1.5	H2O	cg23247845	14490	0	0	0
2024.1.5	H2O	ACTB	14490	0	0	0
2024.1.5	NTC	cg06268921	17028	0	0	0
2024.1.5	NTC	cg23247845	17028	0	0	0
2024.1.5	NTC	ACTB	17028	0	0	0
2024.1.5	B108	cg06268921	14610	0	0	0
2024.1.5	B108	cg23247845	14610	107	8.64788	172.958
2024.1.5	B108	ACTB	14610	179	14.503	290.06
2024.1.5	B121	cg06268921	12378	1	0.0950491	1.90098
2024.1.5	B121	cg23247845	12378	126	12.0371	240.742
2024.1.5	B121	ACTB	12378	204	19.5508	391.016
2024.1.5	B128	cg06268921	12679	0	0	0
2024.1.5	B128	cg23247845	12679	284	26.6517	533.033
2024.1.5	B128	ACTB	12679	450	42.514	850.28
2024.1.5	B129	cg06268921	15089	0	0	0
2024.1.5	B129	cg23247845	15089	158	12.384	247.68
2024.1.5	B129	ACTB	15089	248	19.4969	389.938
Date	Sample	Target	Accepted Droplets	Positives	Conc(copies/µL)	Copies/20µLWell
2024.1.8	M	cg06268921	15148	211	16.5025	330.051
2024.1.8	M	cg23247845	15148	360	28.297	565.94
2024.1.8	M	ACTB	15148	651	51.6786	1033.57
2024.1.8	U	cg06268921	15811	0	0	0
2024.1.8	U	cg23247845	15811	0	0	0
2024.1.8	U	ACTB	15811	294	22.082	441.64
2024.1.8	H2O	cg06268921	15426	0	0	0
2024.1.8	H2O	cg23247845	15426	0	0	0
2024.1.8	H2O	ACTB	15426	0	0	0
2024.1.8	NTC	cg06268921	14764	0	0	0
2024.1.8	NTC	cg23247845	14764	0	0	0
2024.1.8	NTC	ACTB	14764	0	0	0
2024.1.8	B134	cg06268921	13318	0	0	0
2024.1.8	B134	cg23247845	13318	224	19.9558	399.115
2024.1.8	B134	ACTB	13318	409	36.6962	733.924
2024.1.8	B135	cg06268921	13421	1	0.0876622	1.75324
2024.1.8	B135	cg23247845	13421	332	29.4688	589.376
2024.1.8	B135	ACTB	13421	689	62.0025	1240.05
2024.1.8	B136	cg06268921	13469	0	0	0
2024.1.8	B136	cg23247845	13469	147	12.9105	258.21
2024.1.8	B136	ACTB	13469	279	24.6256	492.513
2024.1.8	B137	cg06268921	15019	2	0.156675	3.13349
2024.1.8	B137	cg23247845	15019	147	11.5715	231.431
2024.1.8	B137	ACTB	15019	362	28.7036	574.071
Date	Sample	Target	Accepted Droplets	Positives	Conc(copies/µL)	Copies/20µLWell
2024.1.10	M	cg06268921	13874	117	9.96329	199.266
2024.1.10	M	cg23247845	13874	144	12.2745	245.491
2024.1.10	M	ACTB	13874	297	25.4581	509.162
2024.1.10	U	cg06268921	13331	0	0	0
2024.1.10	U	cg23247845	13331	0	0	0
2024.1.10	U	ACTB	13331	292	26.0556	521.113
2024.1.10	H2O	cg06268921	15468	0	0	0
2024.1.10	H2O	cg23247845	15468	0	0	0
2024.1.10	H2O	ACTB	15468	0	0	0
2024.1.10	NTC	cg06268921	15782	0	0	0
2024.1.10	NTC	cg23247845	15782	0	0	0
2024.1.10	NTC	ACTB	15782	0	0	0
2024.1.10	B380	cg06268921	12839	2	0.183279	3.66559
2024.1.10	B380	cg23247845	12839	223	20.6136	412.272
2024.1.10	B380	ACTB	12839	561	52.5628	1051.26
2024.1.10	B381	cg06268921	12623	0	0	0
2024.1.10	B381	cg23247845	12623	237	22.2985	445.97
2024.1.10	B381	ACTB	12623	647	61.9011	1238.02
2024.1.10	B385	cg06268921	12099	10	0.972772	19.4554
2024.1.10	B385	cg23247845	12099	344	33.9343	678.685
2024.1.10	B385	ACTB	12099	1300	133.729	2674.57
2024.1.10	B393	cg06268921	11677	0	0	0
2024.1.10	B393	cg23247845	11677	115	11.6438	232.876
2024.1.10	B393	ACTB	11677	442	45.3967	907.934
Date	Sample	Target	Accepted Droplets	Positives	Conc(copies/µL)	Copies/20µLWell
2024.1.16	M	cg06268921	14532	124	10.0818	201.635
2024.1.16	M	cg23247845	14532	167	13.5981	271.963
2024.1.16	M	ACTB	14532	341	27.9355	558.709
2024.1.16	U	cg06268921	14211	0	0	0
2024.1.16	U	cg23247845	14211	0	0	0
2024.1.16	U	ACTB	14211	410	34.4415	688.83
2024.1.16	H2O	cg06268921	15453	0	0	0
2024.1.16	H2O	cg23247845	15453	0	0	0
2024.1.16	H2O	ACTB	15453	0	0	0
2024.1.16	NTC	cg06268921	17242	0	0	0
2024.1.16	NTC	cg23247845	17242	0	0	0
2024.1.16	NTC	ACTB	17242	0	0	0
2024.1.16	B361	cg06268921	14801	7	0.556533	11.1307
2024.1.16	B361	cg23247845	14801	569	46.1198	922.395
2024.1.16	B361	ACTB	14801	1183	98.0027	1960.05
2024.1.16	B362	cg06268921	13161	0	0	0
2024.1.16	B362	cg23247845	13161	613	56.1137	1122.27
2024.1.16	B362	ACTB	13161	1307	123.05	2461
2024.1.16	B367	cg06268921	13796	1	0	0
2024.1.16	B367	cg23247845	13796	169	14.5007	290.014
2024.1.16	B367	ACTB	13796	442	38.3091	766.182
Date	Sample	Target	Accepted Droplets	Positives	Conc(copies/µL)	Copies/20µLWell
2024.1.18	M	cg06268921	10919	73	7.89181	157.836
2024.1.18	M	cg23247845	10919	138	14.9636	299.272
2024.1.18	M	ACTB	10919	288	31.4472	628.944
2024.1.18	U	cg06268921	10927	0	0	0
2024.1.18	U	cg23247845	10927	0	0	0
2024.1.18	U	ACTB	10927	260	28.3317	566.634
2024.1.18	H2O	cg06268921	12212	0	0	0
2024.1.18	H2O	cg23247845	12212	0	0	0
2024.1.18	H2O	ACTB	12212	0	0	0
2024.1.18	NTC	cg06268921	12503	0	0	0
2024.1.18	NTC	cg23247845	12503	0	0	0
2024.1.18	NTC	ACTB	12503	0	0	0
2024.1.18	B331	cg06268921	10430	0	0	0
2024.1.18	B331	cg23247845	10430	186	21.1695	423.391
2024.1.18	B331	ACTB	10430	447	51.5325	1030.65
2024.1.18	B312	cg06268921	9468	0	0	0
2024.1.18	B312	cg23247845	9468	244	30.7164	614.327
2024.1.18	B312	ACTB	9468	478	60.9469	1218.94
2024.1.18	B313	cg06268921	11057	0	0	0
2024.1.18	B313	cg23247845	11057	192	20.6083	412.167
2024.1.18	B313	ACTB	11057	525	57.23	1144.6
Date	Sample	Target	Accepted Droplets	Positives	Conc(copies/µL)	Copies/20µLWell
2024.1.22	M	cg06268921	14991	112	8.82259	176.452
2024.1.22	M	cg23247845	14991	157	12.3861	247.722
2024.1.22	M	ACTB	14991	311	24.6635	493.271
2024.1.22	U	cg06268921	14565	0	0	0
2024.1.22	U	cg23247845	14565	0	0	0
2024.1.22	U	ACTB	14565	270	22.0136	440.272
2024.1.22	H2O	cg06268921	15287	0	0	0
2024.1.22	H2O	cg23247845	15287	0	0	0
2024.1.22	H2O	ACTB	15287	0	0	0
2024.1.22	NTC	cg06268921	14781	0	0	0
2024.1.22	NTC	cg23247845	14781	0	0	0
2024.1.22	NTC	ACTB	14781	0	0	0
2024.1.22	B142	cg06268921	11914	0	0	0
2024.1.22	B142	cg23247845	11914	241	24.042	480.84
2024.1.22	B142	ACTB	11914	734	74.8091	1496.18
2024.1.22	B144	cg06268921	13496	1	0.087175	1.7435
2024.1.22	B144	cg23247845	13496	303	26.7141	534.281
2024.1.22	B144	ACTB	13496	630	56.2414	1124.83
2024.1.22	B145	cg06268921	10768	2	0.218533	4.37065
2024.1.22	B145	cg23247845	10768	289	32.0065	640.13
2024.1.22	B145	ACTB	10768	783	88.8174	1776.35
2024.1.22	B147	cg06268921	12608	0	0	0
2024.1.22	B147	cg23247845	12608	226	21.2797	425.594
2024.1.22	B147	ACTB	12608	501	47.7032	954.064
Date	Sample	Target	Accepted Droplets	Positives	Conc(copies/µL)	Copies/20µLWell
2024.1.25	M	cg06268921	11733	84	8.45299	169.06
2024.1.25	M	cg23247845	11733	128	12.9051	258.102
2024.1.25	M	ACTB	11733	235	23.8027	476.054
2024.1.25	U	cg06268921	14574	0	0	0
2024.1.25	U	cg23247845	14574	0	0	0
2024.1.25	U	ACTB	14574	394	32.2431	644.861
2024.1.25	H2O	cg06268921	13189	0	0	0
2024.1.25	H2O	cg23247845	13189	0	0	0
2024.1.25	H2O	ACTB	13189	1	0.0892043	1.78409
2024.1.25	NTC	cg06268921	12989	0	0	0
2024.1.25	NTC	cg23247845	12989	0	0	0
2024.1.25	NTC	ACTB	12989	0	0	0
2024.1.25	B146	cg06268921	10197	1	0.11538	2.3076
2024.1.25	B146	cg23247845	10197	223	26.0139	520.279
2024.1.25	B146	ACTB	10197	480	56.7254	1134.51
2024.1.25	B148	cg06268921	10789	2	0.218107	4.36215
2024.1.25	B148	cg23247845	10789	110	12.0564	241.127
2024.1.25	B148	ACTB	10789	313	34.6355	692.71
2024.1.25	B161	cg06268921	10282	1	0.114426	2.28852
2024.1.25	B161	cg23247845	10282	246	28.4896	569.792
2024.1.25	B161	ACTB	10282	493	57.8065	1156.13
2024.1.25	B170	cg06268921	8872	0	0	0
2024.1.25	B170	cg23247845	8872	196	26.2819	525.639
2024.1.25	B170	ACTB	8872	547	74.8673	1497.35
Date	Sample	Target	Accepted Droplets	Positives	Conc(copies/µL)	Copies/20µLWell
2024.1.30	M	cg06268921	15488	108	8.23243	164.649
2024.1.30	M	cg23247845	15488	151	11.5263	230.525
2024.1.30	M	ACTB	15488	264	20.2264	404.527
2024.1.30	U	cg06268921	15243	0	0	0
2024.1.30	U	cg23247845	15243	0	0	0
2024.1.30	U	ACTB	15243	383	29.938	598.761
2024.1.30	H2O	cg06268921	14874	0	0	0
2024.1.30	H2O	cg23247845	14874	0	0	0
2024.1.30	H2O	ACTB	14874	0	0	0
2024.1.30	NTC	cg06268921	15995	0	0	0
2024.1.30	NTC	cg23247845	15995	0	0	0
2024.1.30	NTC	ACTB	15995	0	0	0
2024.1.30	B169	cg06268921	13754	0	0	0
2024.1.30	B169	cg23247845	13754	327	28.3083	566.167
2024.1.30	B169	ACTB	13754	698	61.2728	1225.46
2024.1.30	B156	cg06268921	11319	1	0.103942	2.07885
2024.1.30	B156	cg23247845	11319	279	29.362	587.24
2024.1.30	B156	ACTB	11319	526	55.9823	1119.65
2024.1.30	B194	cg06268921	10487	1	0.112189	2.24378
2024.1.30	B194	cg23247845	10487	122	13.7666	275.333
2024.1.30	B194	ACTB	10487	335	38.1949	763.898
2024.1.30	B195	cg06268921	14082	1	0.0835472	1.67094
2024.1.30	B195	cg23247845	14082	180	15.1349	302.698
2024.1.30	B195	ACTB	14082	463	39.3312	786.624
Date	Sample	Target	Accepted Droplets	Positives	Conc(copies/µL)	Copies/20µLWell
2024.2.1	M	cg06268921	13195	103	9.21954	184.391
2024.2.1	M	cg23247845	13195	161	14.4431	288.862
2024.2.1	M	ACTB	13195	307	27.6957	553.914
2024.2.1	U	cg06268921	13921	0	0	0
2024.2.1	U	cg23247845	13921	0	0	0
2024.2.1	U	ACTB	13921	453	38.92	778.4
2024.2.1	H2O	cg06268921	15048	0	0	0
2024.2.1	H2O	cg23247845	15048	0	0	0
2024.2.1	H2O	ACTB	15048	0	0	0
2024.2.1	NTC	cg06268921	15680	0	0	0
2024.2.1	NTC	cg23247845	15680	0	0	0
2024.2.1	NTC	ACTB	15680	0	0	0
2024.2.1	B196	cg06268921	13795	0	0	0
2024.2.1	B196	cg23247845	13795	87	7.44306	148.861
2024.2.1	B196	ACTB	13795	302	26.0414	520.828
2024.2.1	B181	cg06268921	12018	1	0.0978964	1.95793
2024.2.1	B181	cg23247845	12018	114	11.213	224.26
2024.2.1	B181	ACTB	12018	415	41.3433	826.867
2024.2.1	B202	cg06268921	11304	1	0.10408	2.0816
2024.2.1	B202	cg23247845	11304	201	21.1074	422.148
2024.2.1	B202	ACTB	11304	485	51.5915	1031.83
2024.2.1	B210	cg06268921	13456	1	0.0874342	1.74868
2024.2.1	B210	cg23247845	13456	248	21.8852	437.703
2024.2.1	B210	ACTB	13456	560	50.0093	1000.19
Date	Sample	Target	Accepted Droplets	Positives	Conc(copies/µL)	Copies/20µLWell
2024.2.29	M	cg06268921	9978	25	2.95136	59.0272
2024.2.29	M	cg23247845	9978	63	7.45166	149.033
2024.2.29	M	ACTB	9978	92	10.8977	217.954
2024.2.29	U	cg06268921	11770	0	0	0
2024.2.29	U	cg23247845	11770	0	0	0
2024.2.29	U	ACTB	11770	262	26.4841	529.682
2024.2.29	H2O	cg06268921	10693	0	0	0
2024.2.29	H2O	cg23247845	10693	0	0	0
2024.2.29	H2O	ACTB	10693	0	0	0
2024.2.29	NTC	cg06268921	10499	0	0	0
2024.2.29	NTC	cg23247845	10499	0	0	0
2024.2.29	NTC	ACTB	10499	0	0	0
2024.2.29	B222	cg06268921	10888	0	0	0
2024.2.29	B222	cg23247845	10888	908	102.445	2048.9
2024.2.29	B222	ACTB	10888	1857	219.998	4399.96
2024.2.29	B193	cg06268921	9402	0	0	0
2024.2.29	B193	cg23247845	9402	154	19.4296	388.591
2024.2.29	B193	ACTB	9402	362	46.1921	923.841
2024.2.29	B240	cg06268921	9420	2	0.249808	4.99616
2024.2.29	B240	cg23247845	9420	184	23.2073	464.146
2024.2.29	B240	ACTB	9420	716	93.0028	1860.06
2024.2.29	B245	cg06268921	9037	0	0	0
2024.2.29	B245	cg23247845	9037	124	16.2546	325.091
2024.2.29	B245	ACTB	9037	521	69.8594	1397.19
Date	Sample	Target	Accepted Droplets	Positives	Conc(copies/µL)	Copies/20µLWell
2024.3.1	M	cg06268921	16175	207	15.1531	303.062
2024.3.1	M	cg23247845	16175	694	51.5922	1031.84
2024.3.1	M	ACTB	16175	288	21.1361	422.722
2024.3.1	U	cg06268921	15233	0	0	0
2024.3.1	U	cg23247845	15233	511	40.1425	802.851
2024.3.1	U	ACTB	15233	0	0	0
2024.3.1	H2O	cg06268921	14731	0	0	0
2024.3.1	H2O	cg23247845	14731	0	0	0
2024.3.1	H2O	ACTB	14731	0	0	0
2024.3.1	NTC	cg06268921	15442	0	0	0
2024.3.1	NTC	cg23247845	15442	0	0	0
2024.3.1	NTC	ACTB	15442	0	0	0
2024.3.1	B254	cg06268921	13860	0	0	0
2024.3.1	B254	cg23247845	13860	240	20.5502	411.005
2024.3.1	B254	ACTB	13860	35	2.97464	59.4929
2024.3.1	B209	cg06268921	13780	3	0.256154	5.12307
2024.3.1	B209	cg23247845	13780	378	32.7227	654.454
2024.3.1	B209	ACTB	13780	95	8.13873	162.775
2024.3.1	B251	cg06268921	11141	0	0	0
2024.3.1	B251	cg23247845	11141	122	12.954	259.081
2024.3.1	B251	ACTB	11141	21	2.21966	44.3931
2024.3.1	B290	cg06268921	9171	0	0	0
2024.3.1	B290	cg23247845	9171	242	31.4611	629.222
2024.3.1	B290	ACTB	9171	20	2.56843	51.3687
Date	Sample	Target	Accepted Droplets	Positives	Conc(copies/µL)	Copies/20µLWell
2024.3.5	M	cg06268921	14196	149	12.4134	248.268
2024.3.5	M	cg23247845	14196	202	16.8607	337.213
2024.3.5	M	ACTB	14196	506	42.6995	853.99
2024.3.5	U	cg06268921	15702	0	0	0
2024.3.5	U	cg23247845	15702	0	0	0
2024.3.5	U	ACTB	15702	470	35.7525	715.05
2024.3.5	H2O	cg06268921	16976	0	0	0
2024.3.5	H2O	cg23247845	16976	0	0	0
2024.3.5	H2O	ACTB	16976	0	0	0
2024.3.5	NTC	cg06268921	12097	0	0	0
2024.3.5	NTC	cg23247845	12097	0	0	0
2024.3.5	NTC	ACTB	12097	0	0	0
2024.3.5	B296	cg06268921	11769	0	0	0
2024.3.5	B296	cg23247845	11769	55	5.51088	110.218
2024.3.5	B296	ACTB	11769	220	22.2001	444.002
2024.3.5	B306	cg06268921	11376	0	0	0
2024.3.5	B306	cg23247845	11376	109	11.3268	226.536
2024.3.5	B306	ACTB	11376	215	22.4474	448.949
2024.3.5	B395	cg06268921	14736	3	0.239534	4.79068
2024.3.5	B395	cg23247845	14736	130	10.4248	208.496
2024.3.5	B395	ACTB	14736	556	45.2482	904.964
2024.3.5	B333	cg06268921	12586	1	0.0934783	1.86957
2024.3.5	B333	cg23247845	12586	72	6.74949	134.99
2024.3.5	B333	ACTB	12586	225	21.222	424.441
Date	Sample	Target	Accepted Droplets	Positives	Conc(copies/µL)	Copies/20µLWell
2024.3.7	M	cg06268921	14916	175	13.8844	277.688
2024.3.7	M	cg23247845	14916	230	18.2821	365.642
2024.3.7	M	ACTB	14916	465	37.2598	745.196
2024.3.7	U	cg06268921	15105	0	0	0
2024.3.7	U	cg23247845	15105	0	0	0
2024.3.7	U	ACTB	15105	396	31.2544	625.089
2024.3.7	H2O	cg06268921	15917	0	0	0
2024.3.7	H2O	cg23247845	15917	0	0	0
2024.3.7	H2O	ACTB	15917	0	0	0
2024.3.7	NTC	cg06268921	14144	0	0	0
2024.3.7	NTC	cg23247845	14144	0	0	0
2024.3.7	NTC	ACTB	14144	0	0	0
2024.3.7	B221	cg06268921	11945	2	0.196998	3.93995
2024.3.7	B221	cg23247845	11945	60	5.92433	118.487
2024.3.7	B221	ACTB	11945	205	20.3658	407.317
2024.3.7	B220	cg06268921	12862	0	0	0
2024.3.7	B220	cg23247845	12862	130	11.9514	239.029
2024.3.7	B220	ACTB	12862	541	50.5554	1011.11
2024.3.7	B255	cg06268921	11649	0	0	0
2024.3.7	B255	cg23247845	11649	36	3.64139	72.8277
2024.3.7	B255	ACTB	11649	160	16.2709	325.418
2024.3.7	B345	cg06268921	12632	0	0	0
2024.3.7	B345	cg23247845	12632	64	5.97574	119.515
2024.3.7	B345	ACTB	12632	162	15.1853	303.706
Date	Sample	Target	Accepted Droplets	Positives	Conc(copies/µL)	Copies/20µLWell
2024.3.12	M	cg06268921	13719	131	11.2879	225.757
2024.3.12	M	cg23247845	13719	227	19.6292	392.584
2024.3.12	M	ACTB	13719	449	39.1481	782.962
2024.3.12	U	cg06268921	14355	0	0	0
2024.3.12	U	cg23247845	14355	0	0	0
2024.3.12	U	ACTB	14355	384	31.8995	637.99
2024.3.12	H2O	cg06268921	15484	0	0	0
2024.3.12	H2O	cg23247845	15484	0	0	0
2024.3.12	H2O	ACTB	15484	0	0	0
2024.3.12	NTC	cg06268921	15890	0	0	0
2024.3.12	NTC	cg23247845	15890	0	0	0
2024.3.12	NTC	ACTB	15890	0	0	0
2024.3.12	B325	cg06268921	10147	0	0	0
2024.3.12	B325	cg23247845	10147	66	7.67721	153.544
2024.3.12	B325	ACTB	10147	191	22.3561	447.123
2024.3.12	B402	cg06268921	12547	1	0.0937688	1.87538
2024.3.12	B402	cg23247845	12547	45	4.22701	84.5403
2024.3.12	B402	ACTB	12547	147	13.8648	277.297
2024.3.12	B406	cg06268921	11381	1	0.103376	2.06752
2024.3.12	B406	cg23247845	11381	156	16.2375	324.75
2024.3.12	B406	ACTB	11381	568	60.2308	1204.62
Date	Sample	Target	Accepted Droplets	Positives	Conc(copies/µL)	Copies/20µLWell
2024.3.13	M	cg06268921	15973	202	14.9729	299.458
2024.3.13	M	cg23247845	15973	268	19.9067	398.133
2024.3.13	M	ACTB	15973	583	43.7434	874.867
2024.3.13	U	cg06268921	17186	0	0	0
2024.3.13	U	cg23247845	17186	0	0	0
2024.3.13	U	ACTB	17186	572	39.8228	796.456
2024.3.13	H2O	cg06268921	17681	0	0	0
2024.3.13	H2O	cg23247845	17681	0	0	0
2024.3.13	H2O	ACTB	17681	0	0	0
2024.3.13	NTC	cg06268921	16268	0	0	0
2024.3.13	NTC	cg23247845	16268	0	0	0
2024.3.13	NTC	ACTB	16268	0	0	0
2024.3.13	B429	cg06268921	13536	2	0.173841	3.47682
2024.3.13	B429	cg23247845	13536	86	7.49847	149.969
2024.3.13	B429	ACTB	13536	353	31.0879	621.757
2024.3.13	B431	cg06268921	12911	0	0	0
2024.3.13	B431	cg23247845	12911	443	41.0756	821.513
2024.3.13	B431	ACTB	12911	2174	216.922	4338.45
2024.3.13	B433	cg06268921	13451	0	0	0
2024.3.13	B433	cg23247845	13451	95	8.33851	166.77
2024.3.13	B433	ACTB	13451	671	60.2024	1204.05
2024.3.13	B435	cg06268921	11112	0	0	0
2024.3.13	B435	cg23247845	11112	67	7.11502	142.3
2024.3.13	B435	ACTB	11112	362	38.9645	779.291
Date	Sample	Target	Accepted Droplets	Positives	Conc(copies/µL)	Copies/20µLWell
2024.3.14	M	cg06268921	14809	197	15.7553	315.106
2024.3.14	M	cg23247845	14809	265	21.243	424.86
2024.3.14	M	ACTB	14809	580	47.0035	940.07
2024.3.14	U	cg06268921	16494	0	0	0
2024.3.14	U	cg23247845	16494	0	0	0
2024.3.14	U	ACTB	16494	551	39.9727	799.454
2024.3.14	H2O	cg06268921	15199	0	0	0
2024.3.14	H2O	cg23247845	15199	0	0	0
2024.3.14	H2O	ACTB	15199	0	0	0
2024.3.14	NTC	cg06268921	14276	0	0	0
2024.3.14	NTC	cg23247845	14276	0	0	0
2024.3.14	NTC	ACTB	14276	0	0	0
2024.3.14	B432	cg06268921	11732	2	0.200575	4.01149
2024.3.14	B432	cg23247845	11732	228	23.0886	461.773
2024.3.14	B432	ACTB	11732	758	78.578	1571.56
2024.3.14	B447	cg06268921	12194	0	0	0
2024.3.14	B447	cg23247845	12194	157	15.2456	304.913
2024.3.14	B447	ACTB	12194	500	49.2566	985.133
2024.3.14	B448	cg06268921	11772	1	0.0999423	1.99885
2024.3.14	B448	cg23247845	11772	101	10.1373	202.746
2024.3.14	B448	ACTB	11772	937	97.5791	1951.58
2024.3.14	B451	cg06268921	13228	2	0.177889	3.55779
2024.3.14	B451	cg23247845	13228	270	24.2617	485.234
2024.3.14	B451	ACTB	13228	944	87.1038	1742.08
Date	Sample	Target	Accepted Droplets	Positives	Conc(copies/µL)	Copies/20µLWell
2024.3.19	M	cg06268921	14015	192	16.2286	324.572
2024.3.19	M	cg23247845	14015	334	28.3767	567.534
2024.3.19	M	ACTB	14015	604	51.827	1036.54
2024.3.19	U	cg06268921	14376	0	0	0
2024.3.19	U	cg23247845	14376	0	0	0
2024.3.19	U	ACTB	14376	533	44.4476	888.952
2024.3.19	H2O	cg06268921	17817	0	0	0
2024.3.19	H2O	cg23247845	17817	0	0	0
2024.3.19	H2O	ACTB	17817	0	0	0
2024.3.19	NTC	cg06268921	10967	0	0	0
2024.3.19	NTC	cg23247845	10967	0	0	0
2024.3.19	NTC	ACTB	10967	0	0	0
2024.3.19	B466	cg06268921	12023	2	0.19572	3.91439
2024.3.19	B466	cg23247845	12023	303	30.0291	600.581
2024.3.19	B466	ACTB	12023	1020	104.298	2085.97
2024.3.19	B476	cg06268921	10887	2	0.216144	4.32288
2024.3.19	B476	cg23247845	10887	179	19.5039	390.077
2024.3.19	B476	ACTB	10887	753	84.3215	1686.43
2024.3.19	B467	cg06268921	11907	0	0	0
2024.3.19	B467	cg23247845	11907	106	10.5202	210.404
2024.3.19	B467	ACTB	11907	433	43.5798	871.597
2024.3.19	B470	cg06268921	12805	0	0	0
2024.3.19	B470	cg23247845	12805	218	20.2014	404.028
2024.3.19	B470	ACTB	12805	667	62.9349	1258.7
Date	Sample	Target	Accepted Droplets	Positives	Conc(copies/µL)	Copies/20µLWell
2024.3.21	M	cg06268921	16598	237	16.9197	338.394
2024.3.21	M	cg23247845	16598	340	24.3495	486.991
2024.3.21	M	ACTB	16598	737	53.434	1068.68
2024.3.21	U	cg06268921	17409	0	0	0
2024.3.21	U	cg23247845	17409	0	0	0
2024.3.21	U	ACTB	17409	550	37.7679	755.357
2024.3.21	H2O	cg06268921	15224	0	0	0
2024.3.21	H2O	cg23247845	15224	0	0	0
2024.3.21	H2O	ACTB	15224	0	0	0
2024.3.21	NTC	cg06268921	13768	0	0	0
2024.3.21	NTC	cg23247845	13768	0	0	0
2024.3.21	NTC	ACTB	13768	0	0	0
2024.3.21	B487	cg06268921	12370	0	0	0
2024.3.21	B487	cg23247845	12370	196	18.7902	375.804
2024.3.21	B487	ACTB	12370	877	86.513	1730.26
2024.3.21	B489	cg06268921	13899	3	0.25396	5.0792
2024.3.21	B489	cg23247845	13899	363	31.1342	622.685
2024.3.21	B489	ACTB	13899	1112	98.1034	1962.07
2024.3.21	B508	cg06268921	13649	1	0.0861978	1.72396
2024.3.21	B508	cg23247845	13649	66	5.70264	114.053
2024.3.21	B508	ACTB	13649	421	36.8594	737.187
2024.3.21	B506	cg06268921	11969	0	0	0
2024.3.21	B506	cg23247845	11969	163	16.1319	322.638
2024.3.21	B506	ACTB	11969	739	74.9779	1499.56
Date	Sample	Target	Accepted Droplets	Positives	Conc(copies/µL)	Copies/20µLWell
2024.3.25	M	cg06268921	14986	215	17.0007	340.015
2024.3.25	M	cg23247845	14986	250	19.7917	395.834
2024.3.25	M	ACTB	14986	665	53.3993	1067.99
2024.3.25	U	cg06268921	14703	0	0	0
2024.3.25	U	cg23247845	14703	0	0	0
2024.3.25	U	ACTB	14703	582	47.5159	950.318
2024.3.25	H2O	cg06268921	16447	0	0	0
2024.3.25	H2O	cg23247845	16447	0	0	0
2024.3.25	H2O	ACTB	16447	0	0	0
2024.3.25	NTC	cg06268921	18793	0	0	0
2024.3.25	NTC	cg23247845	18793	0	0	0
2024.3.25	NTC	ACTB	18793	0	0	0
2024.3.25	B519	cg06268921	13448	1	0.0874862	1.74972
2024.3.25	B519	cg23247845	13448	189	16.6516	333.031
2024.3.25	B519	ACTB	13448	812	73.2712	1465.42
2024.3.25	B518	cg06268921	14821	1	0.0793813	1.58763
2024.3.25	B518	cg23247845	14821	200	15.9838	319.676
2024.3.25	B518	ACTB	14821	1161	95.9685	1919.37
2024.3.25	B525	cg06268921	14015	0	0	0
2024.3.25	B525	cg23247845	14015	291	24.6848	493.695
2024.3.25	B525	ACTB	14015	1506	133.741	2674.82
2024.3.25	B502	cg06268921	13125	0	0	0
2024.3.25	B502	cg23247845	13125	116	10.444	208.88
2024.3.25	B502	ACTB	13125	615	56.4594	1129.19
Date	Sample	Target	Accepted Droplets	Positives	Conc(copies/µL)	Copies/20µLWell
2024.3.27	M	cg06268921	17080	244	16.9279	338.559
2024.3.27	M	cg23247845	17080	338	23.5149	470.298
2024.3.27	M	ACTB	17080	822	58.0272	1160.54
2024.3.27	U	cg06268921	16277	0	0	0
2024.3.27	U	cg23247845	16277	0	0	0
2024.3.27	U	ACTB	16277	671	49.5266	990.532
2024.3.27	H2O	cg06268921	15288	0	0	0
2024.3.27	H2O	cg23247845	15288	0	0	0
2024.3.27	H2O	ACTB	15288	0	0	0
2024.3.27	NTC	cg06268921	14224	0	0	0
2024.3.27	NTC	cg23247845	14224	0	0	0
2024.3.27	NTC	ACTB	14224	0	0	0
2024.3.27	B369	cg06268921	11404	0	0	0
2024.3.27	B369	cg23247845	11404	101	10.4659	209.318
2024.3.27	B369	ACTB	11404	466	49.0838	981.675
2024.3.27	B408	cg06268921	11403	9	0.928915	18.5783
2024.3.27	B408	cg23247845	11403	74	7.65961	153.192
2024.3.27	B408	ACTB	11403	249	25.9745	519.489
2024.3.27	B461	cg06268921	12702	0	0	0
2024.3.27	B461	cg23247845	12702	141	13.1326	262.651
2024.3.27	B461	ACTB	12702	546	51.6901	1033.8
Date	Sample	Target	Accepted Droplets	Positives	Conc(copies/µL)	Copies/20µLWell
2024.4.1	M	cg06268921	15112	214	16.779	335.58
2024.4.1	M	cg23247845	15112	337	26.5324	530.649
2024.4.1	M	ACTB	15112	769	61.4437	1228.87
2024.4.1	U	cg06268921	10252	0	0	0
2024.4.1	U	cg23247845	10252	0	0	0
2024.4.1	U	ACTB	10252	409	47.8968	957.936
2024.4.1	H2O	cg06268921	11825	0	0	0
2024.4.1	H2O	cg23247845	11825	0	0	0
2024.4.1	H2O	ACTB	11825	0	0	0
2024.4.1	NTC	cg06268921	13929	0	0	0
2024.4.1	NTC	cg23247845	13929	0	0	0
2024.4.1	NTC	ACTB	13929	0	0	0
2024.4.1	B086	cg06268921	12353	0	0	0
2024.4.1	B086	cg23247845	12353	373	36.071	721.42
2024.4.1	B086	ACTB	12353	956	94.7633	1895.27
2024.4.1	B089	cg06268921	11562	0	0	0
2024.4.1	B089	cg23247845	11562	180	18.4596	369.193
2024.4.1	B089	ACTB	11562	1259	135.634	2712.68
2024.4.1	B415	cg06268921	13055	0	0	0
2024.4.1	B415	cg23247845	13055	52	4.69541	93.9083
2024.4.1	B415	ACTB	13055	246	22.3802	447.604
2024.4.1	B090	cg06268921	11595	1	0.101468	2.02936
2024.4.1	B090	cg23247845	11595	140	14.2914	285.827
2024.4.1	B090	ACTB	11595	458	47.413	948.261
Date	Sample	Target	Accepted Droplets	Positives	Conc(copies/µL)	Copies/20µLWell
2024.4.29	M	cg06268921	13553	158	13.7958	275.916
2024.4.29	M	cg23247845	13553	224	19.6068	392.137
2024.4.29	M	ACTB	13553	544	48.1959	963.918
2024.4.29	U	cg06268921	13422	0	0	0
2024.4.29	U	cg23247845	13422	0	0	0
2024.4.29	U	ACTB	13422	259	22.9239	458.477
2024.4.29	H2O	cg06268921	12042	0	0	0
2024.4.29	H2O	cg23247845	12042	0	0	0
2024.4.29	H2O	ACTB	12042	0	0	0
2024.4.29	NTC	cg06268921	11037	0	0	0
2024.4.29	NTC	cg23247845	11037	0	0	0
2024.4.29	NTC	ACTB	11037	0	0	0
2024.4.29	LB2	cg06268921	10441	1	0.112683	2.25367
2024.4.29	LB2	cg23247845	10441	250	28.5122	570.244
2024.4.29	LB2	ACTB	10441	859	101.005	2020.09
2024.4.29	LB3	cg06268921	10354	3	0.340924	6.81847
2024.4.29	LB3	cg23247845	10354	136	15.5553	311.107
2024.4.29	LB3	ACTB	10354	539	62.8954	1257.91
2024.4.29	LB8	cg06268921	8647	2	0.272142	5.44284
2024.4.29	LB8	cg23247845	8647	163	22.3887	447.774
2024.4.29	LB8	ACTB	8647	726	103.171	2063.41
2024.4.29	LB33	cg06268921	11568	0	0	0
2024.4.29	LB33	cg23247845	11568	80	8.1643	163.286
2024.4.29	LB33	ACTB	11568	203	20.8285	416.57
2024.4.29	LB7	cg06268921	13846	0	0	0
2024.4.29	LB7	cg23247845	13846	69	5.87747	117.549
2024.4.29	LB7	ACTB	13846	271	23.2547	465.095
2024.4.29	LB4	cg06268921	14837	82	6.52006	130.401
2024.4.29	LB4	cg23247845	14837	125	9.95362	199.072
2024.4.29	LB4	ACTB	14837	867	70.8375	1416.75
2024.4.29	B422	cg06268921	13767	0	0	0
2024.4.29	B422	cg23247845	13767	234	20.1686	403.371
2024.4.29	B422	ACTB	13767	782	68.7995	1375.99
2024.4.29	B463	cg06268921	14031	1	0.0838509	1.67702
2024.4.29	B463	cg23247845	14031	129	10.8664	217.328
2024.4.29	B463	ACTB	14031	514	43.9071	878.142
2024.4.29	B478	cg06268921	15119	0	0	0
2024.4.29	B478	cg23247845	15119	86	6.71111	134.222
2024.4.29	B478	ACTB	15119	226	17.7187	354.375
2024.4.29	B481	cg06268921	15587	1	0.0754801	1.5096
2024.4.29	B481	cg23247845	15587	222	16.8765	337.53
2024.4.29	B481	ACTB	15587	588	45.2397	904.793
2024.4.29	B491	cg06268921	14334	1	0.0820784	1.64157
2024.4.29	B491	cg23247845	14334	170	14.0362	280.725
2024.4.29	B491	ACTB	14334	667	56.059	1121.18
2024.4.29	B495	cg06268921	14874	0	0	0
2024.4.29	B495	cg23247845	14874	475	38.1835	763.67
2024.4.29	B495	ACTB	14874	1234	101.892	2037.84
